# Supplementary material
Source: PubMed Central journal article supplement (PMC3845839)
Supplement: NIHMS529254-supplement-Supplementary_Figures.pdf [file NIHMS529254-supplement-Supplementary_Figures.pdf]

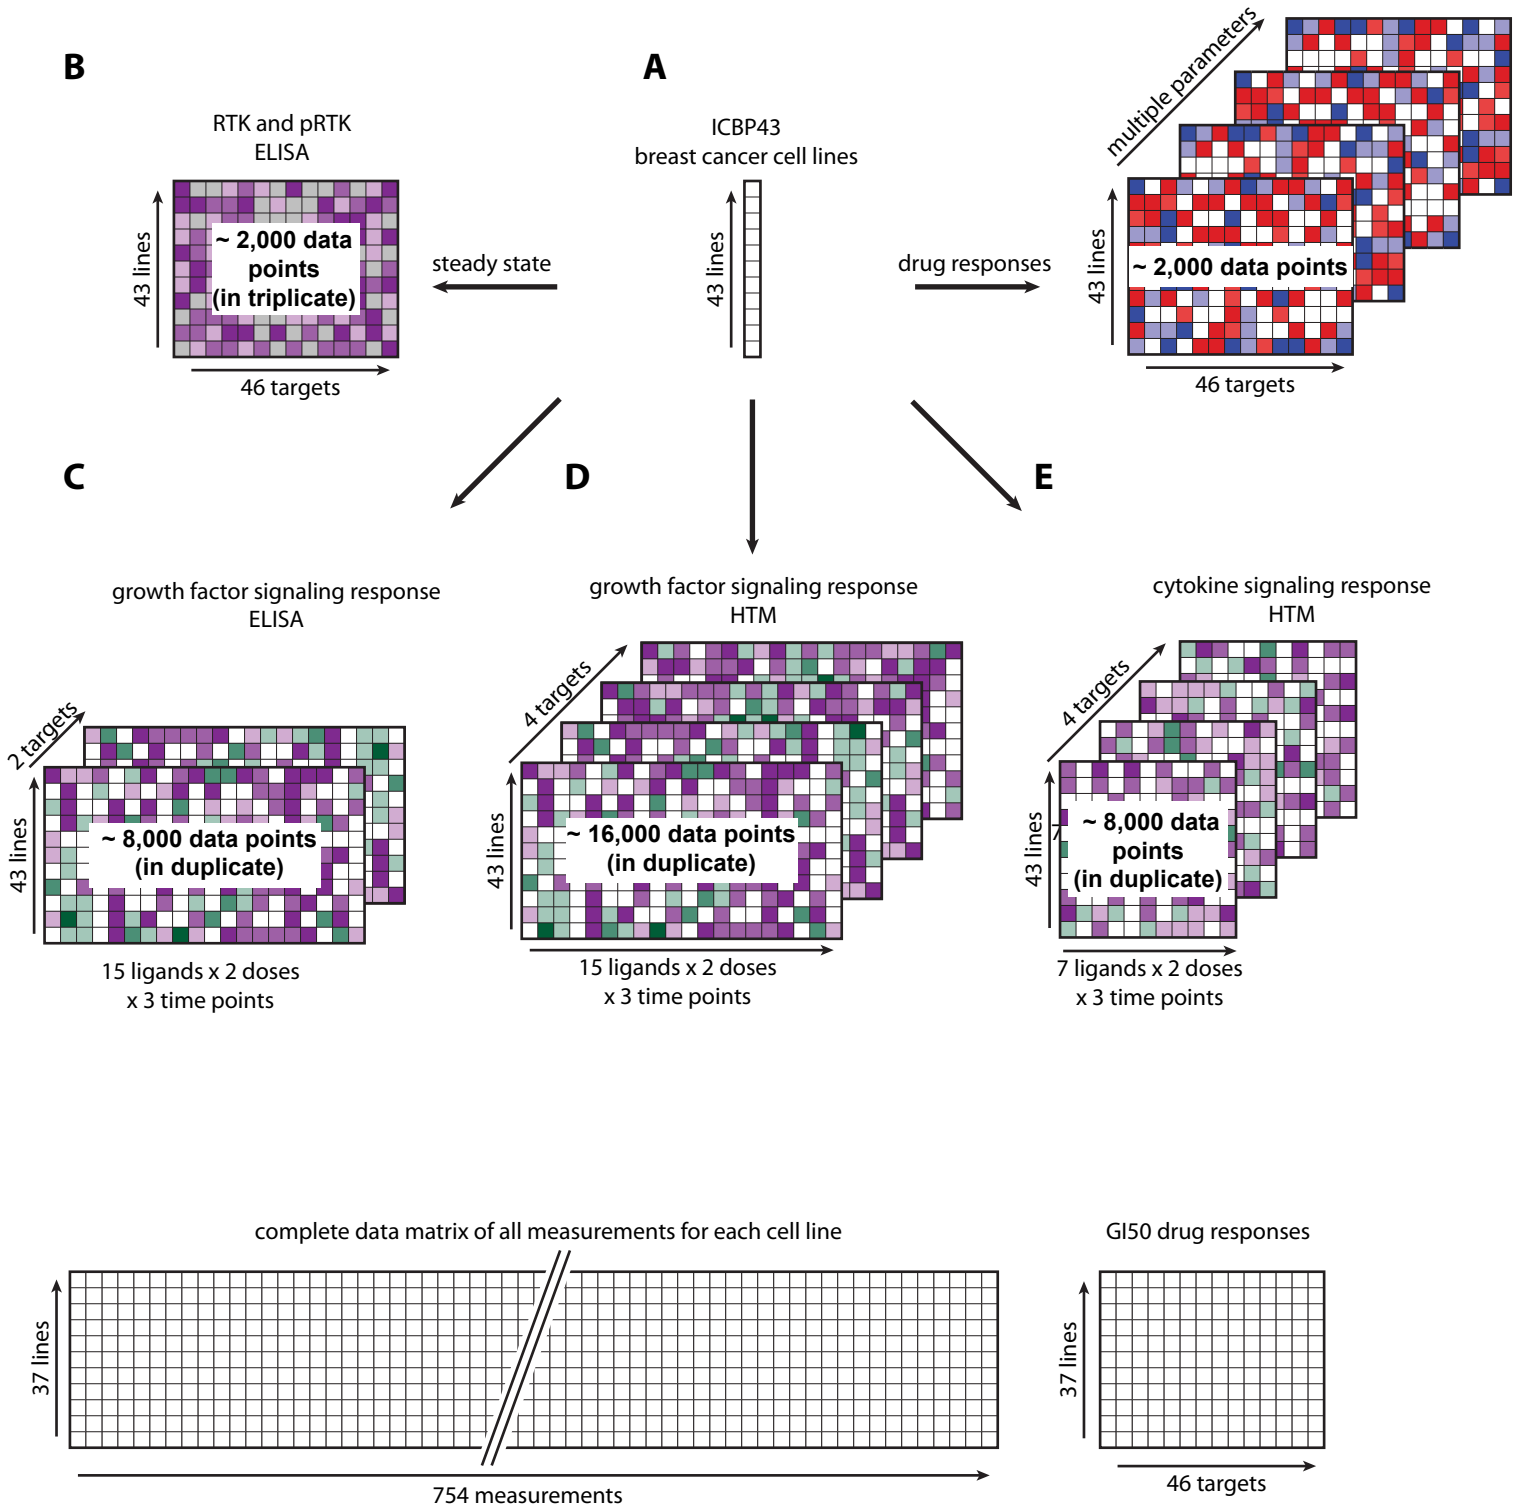

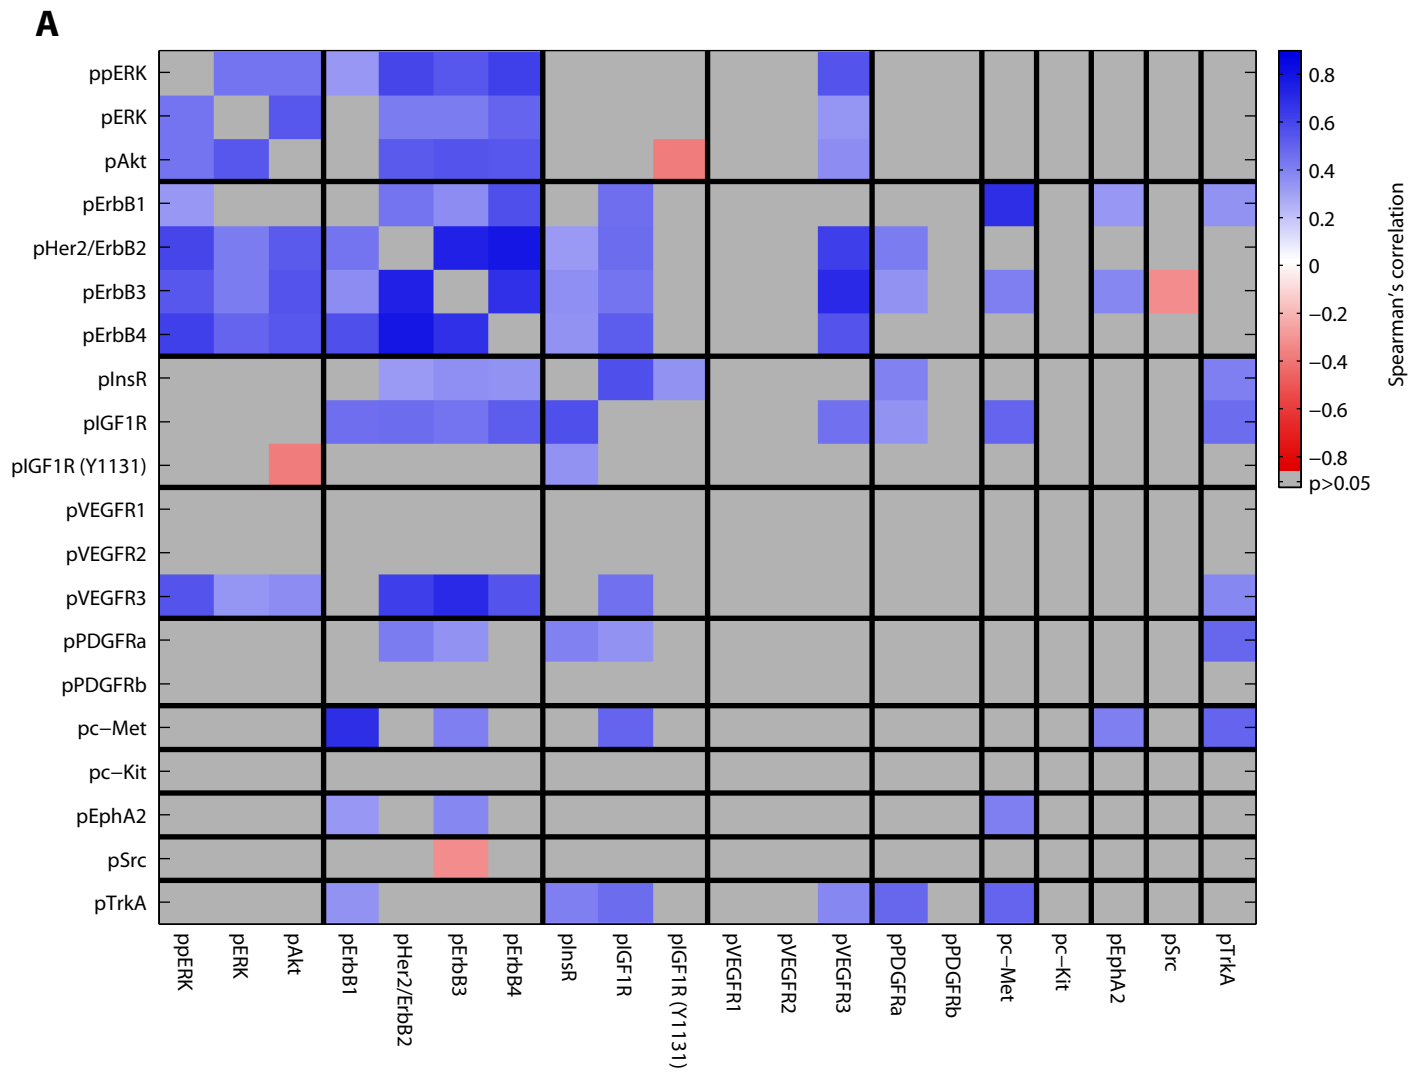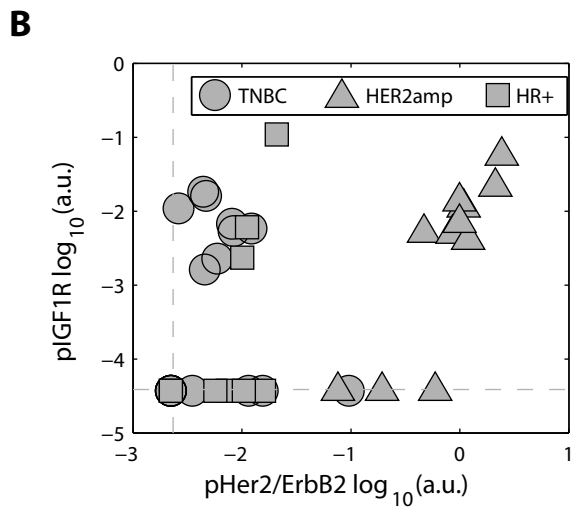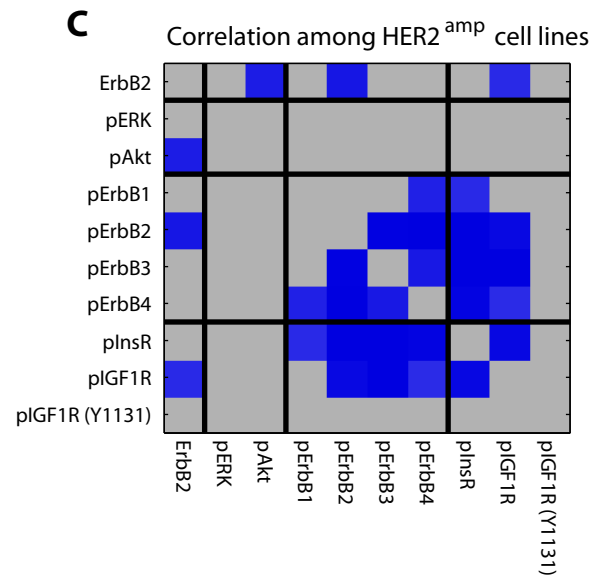

**A**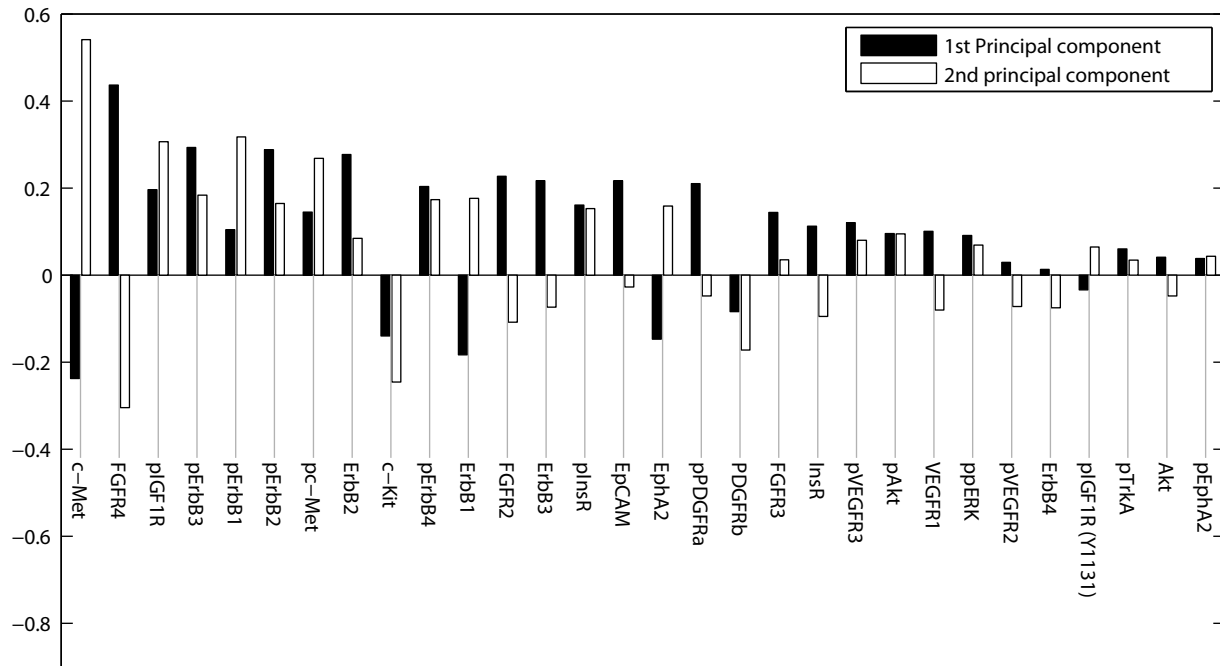**B**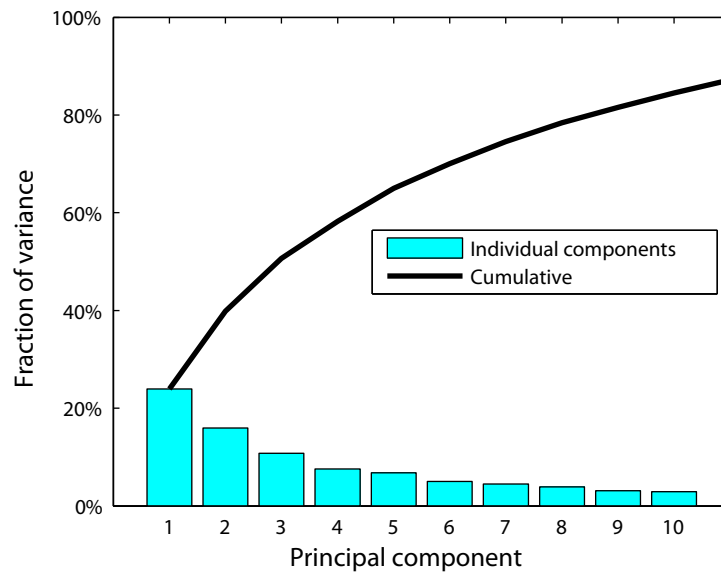

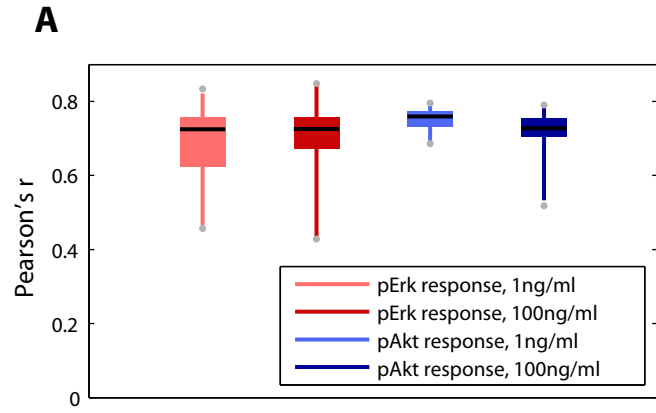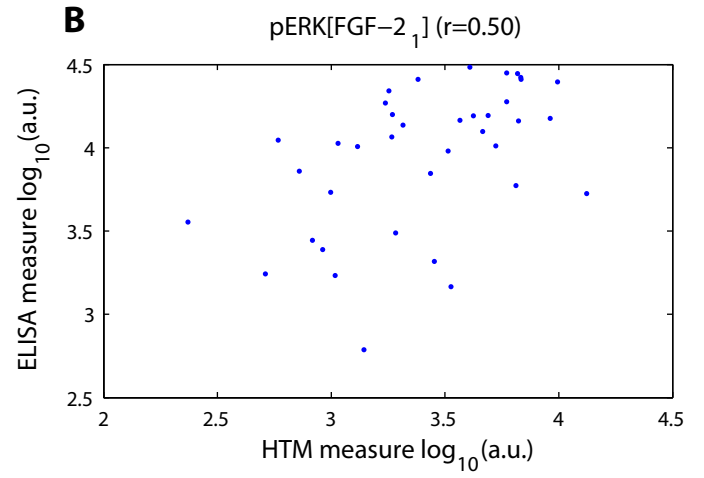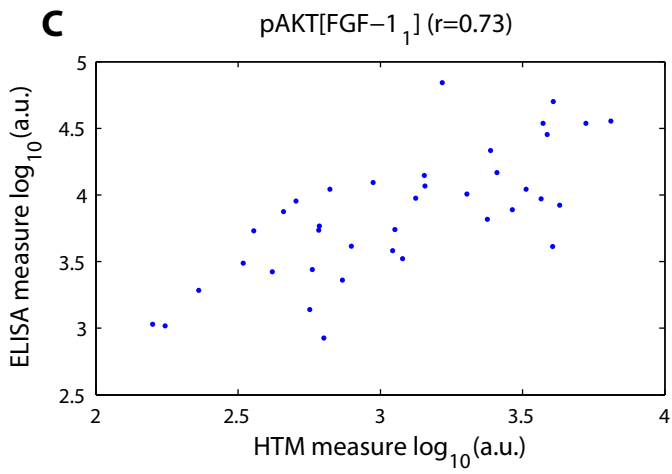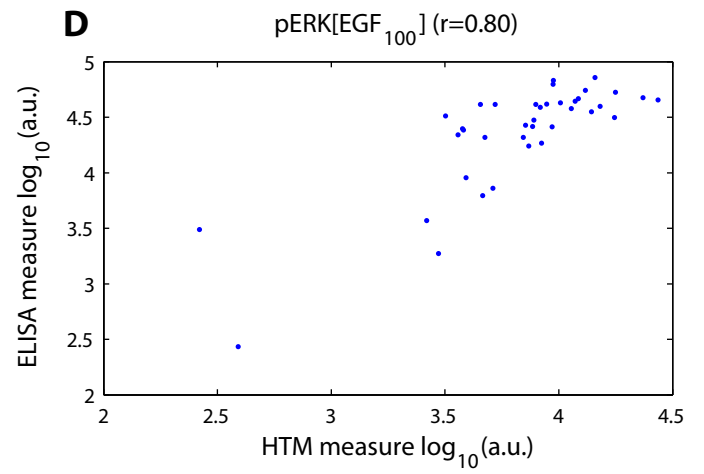

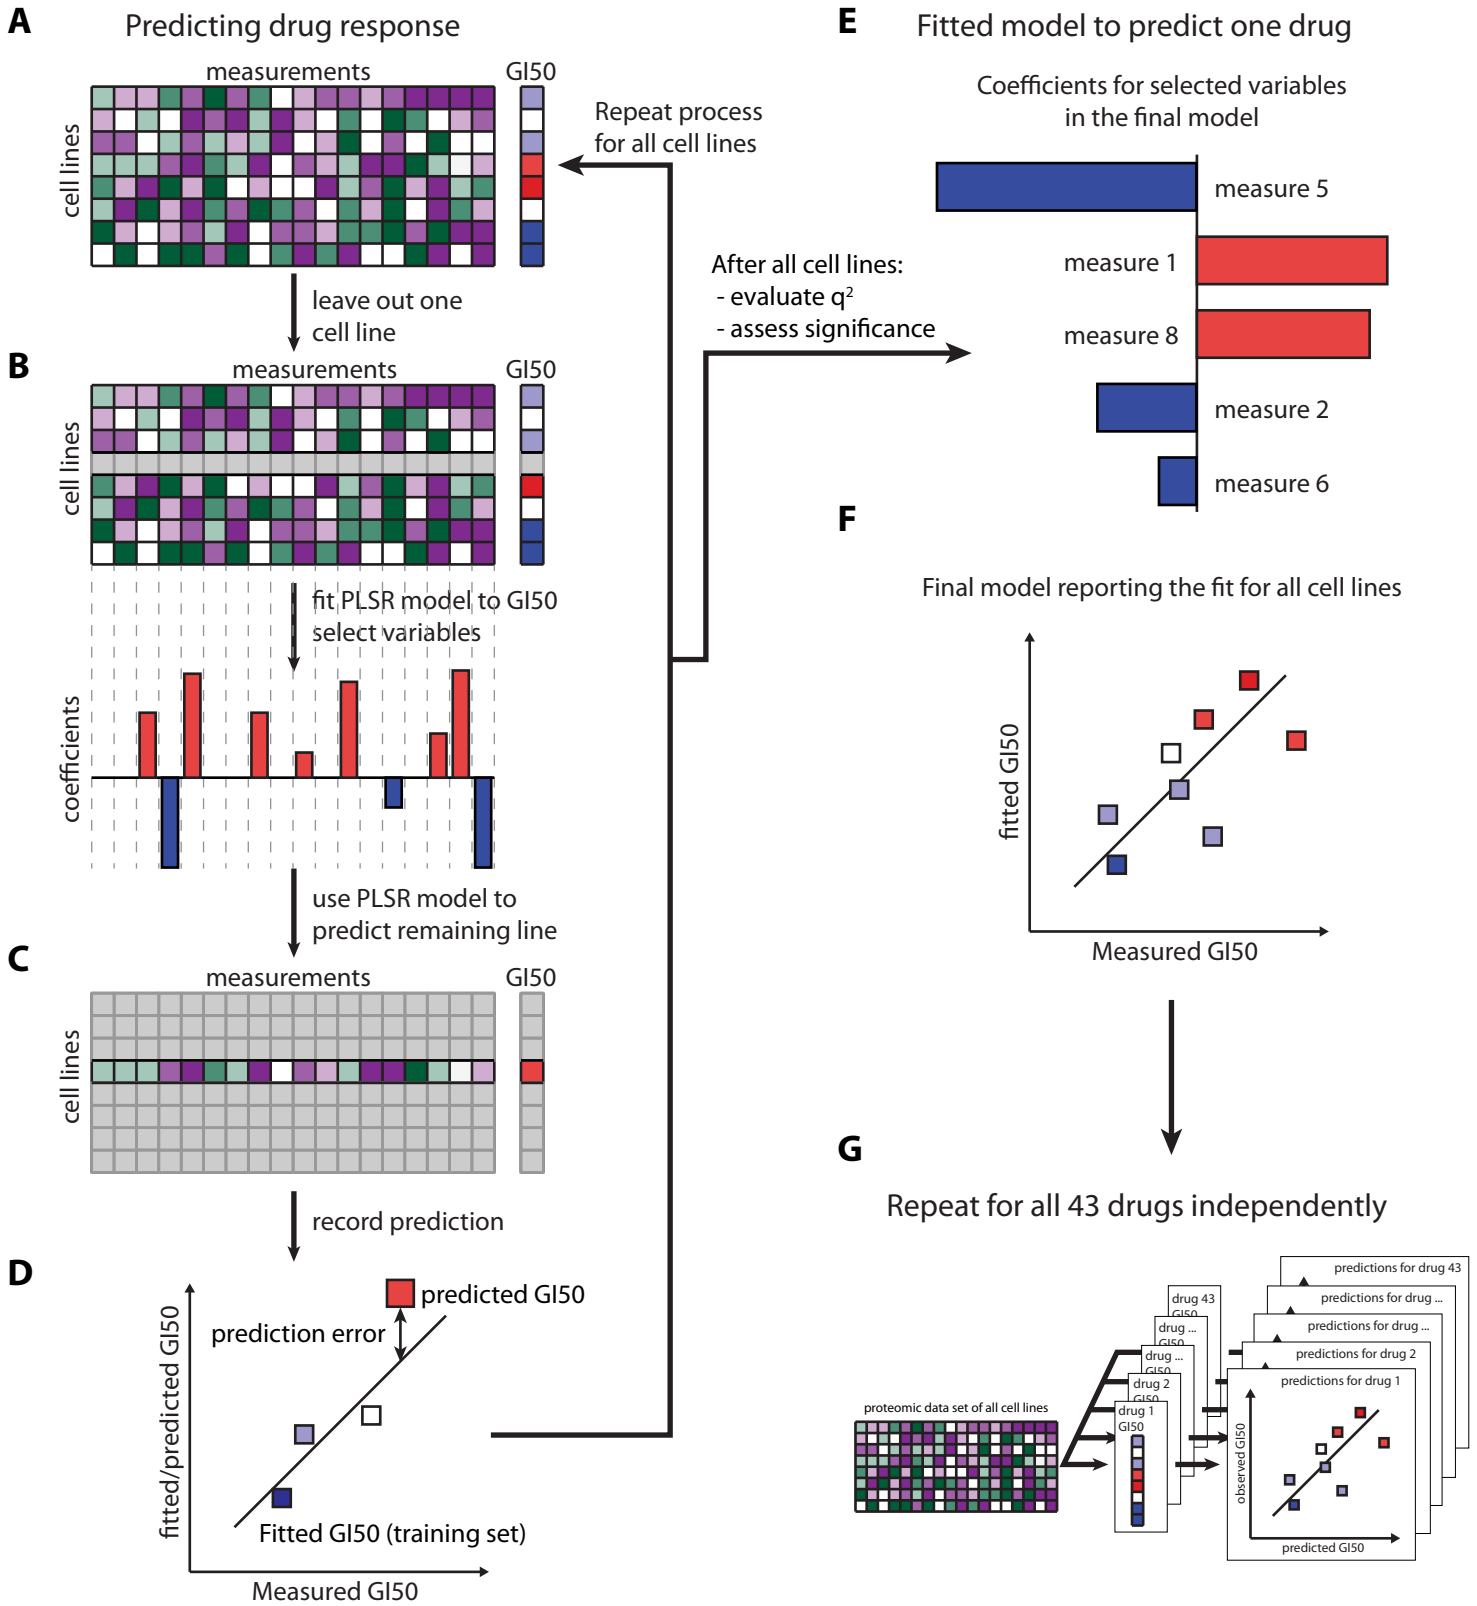

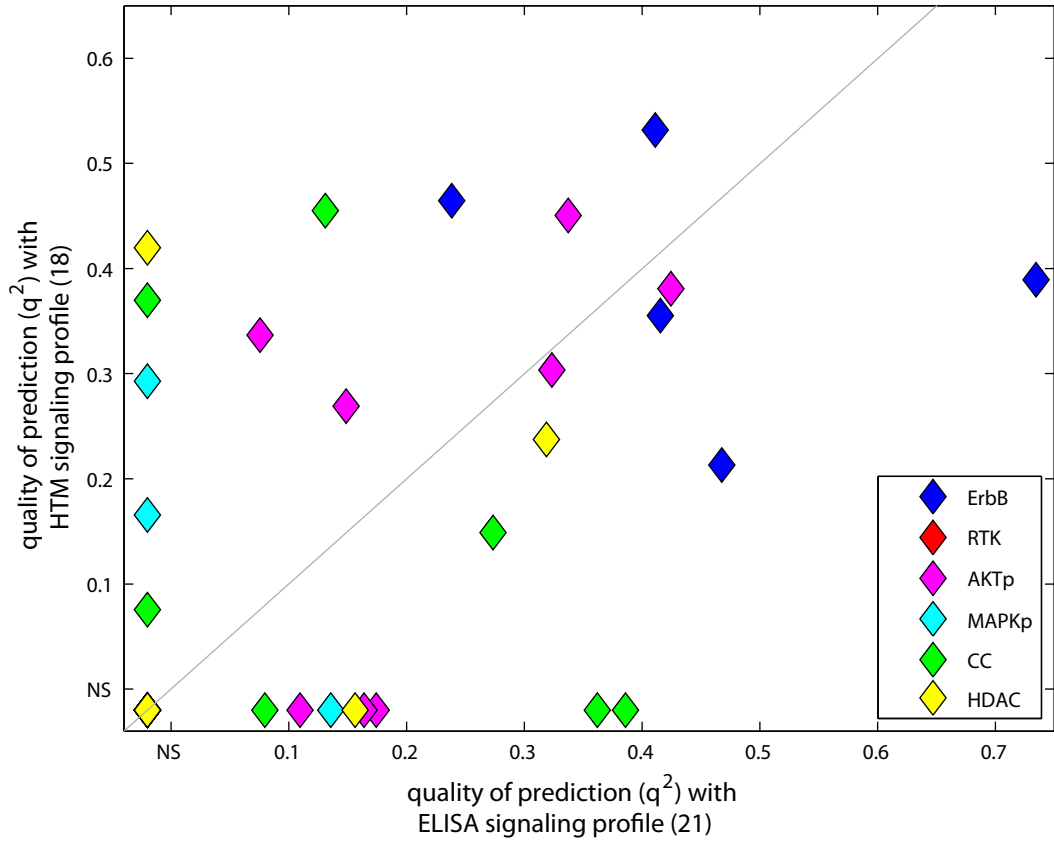

**A**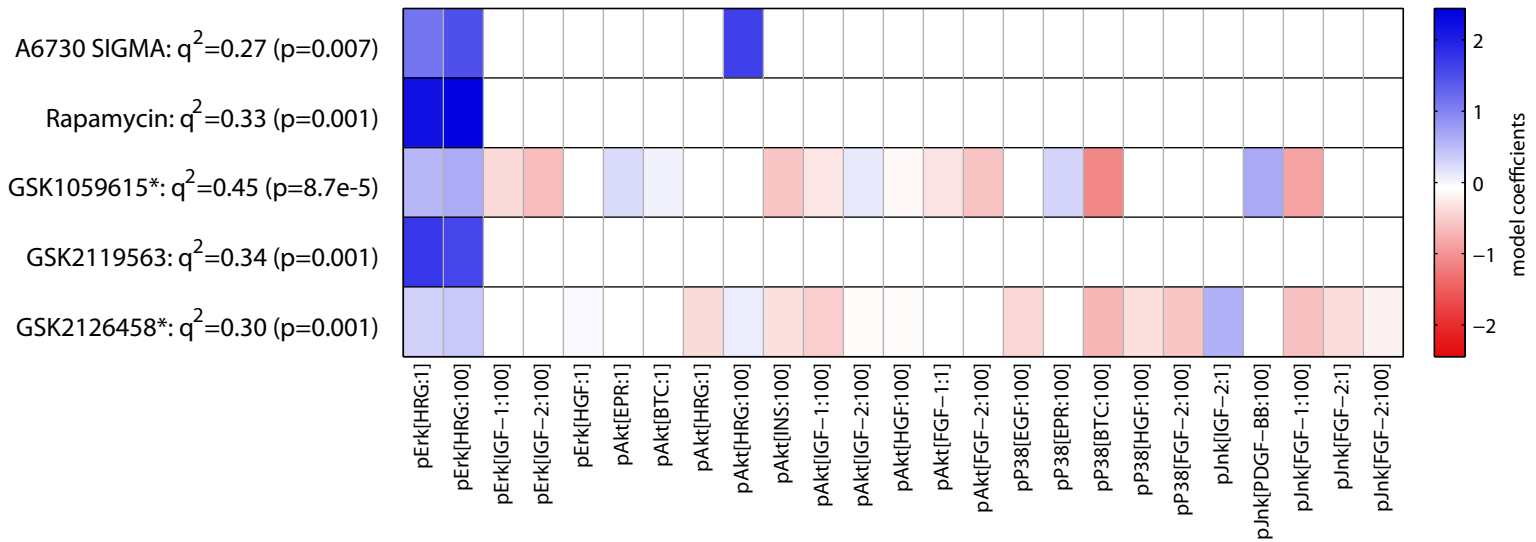**B**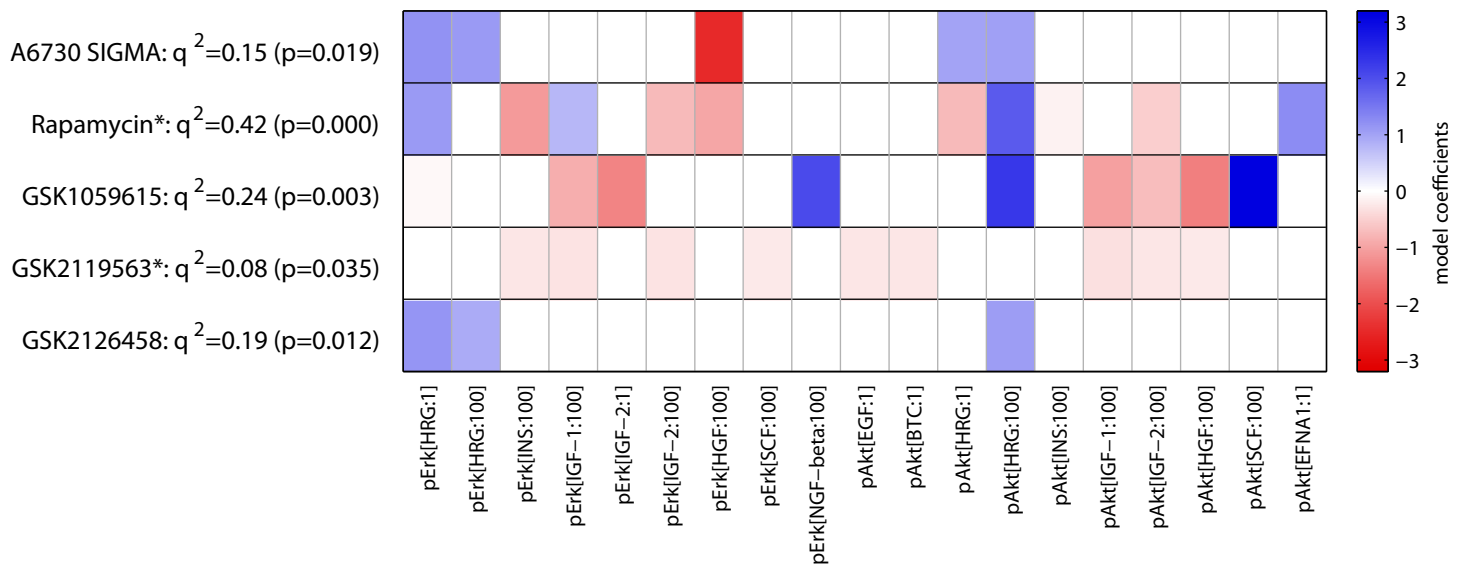

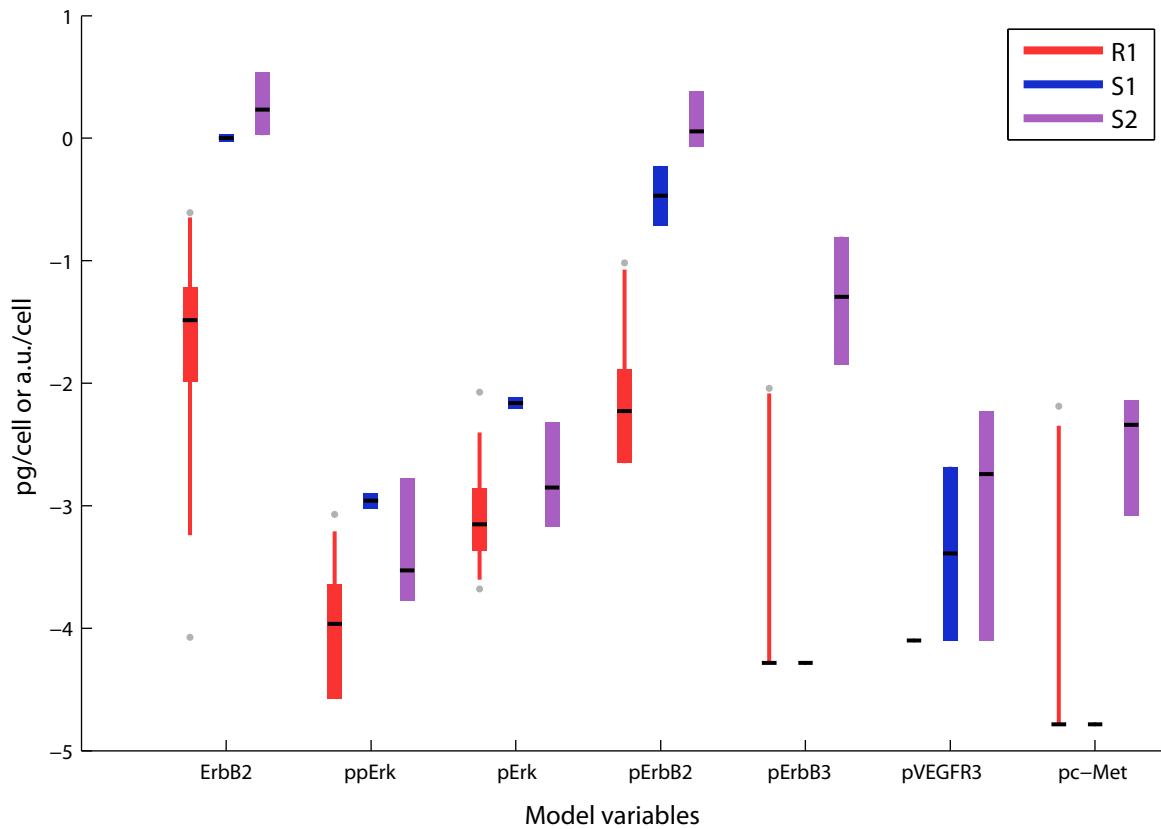

**Distribution of model variables in each cluster for Lapatinib network representation.** Distribution of the model variables for the cell lines that were part of the resistant cluster R1 (in red) or were part of the sensitive clusters S1 (blue) and S2 (purple). For R1, the box plot illustrates the 10-90% range (line), the interquartile (box) and the median (black bar); a collapsed box means as for pErbB3 means that more than 75% of the cell lines are below the detection threshold for the given variable; for S1 and S2, the box represents the full range and the line is the median.
