# Supplementary material
Source: PubMed Central journal article supplement (PMC3845839)
Supplement: NIHMS529254-supplement-Supplementary_Materials_without_SFigures.pdf [file NIHMS529254-supplement-Supplementary_Materials_without_SFigures.pdf]

## Text S1: Prediction Algorithm and Statistical Tests

### *Overview of the approach*

Our approach to identifying basal states and ligand responses predictive of sensitivity to small molecule drugs relies on partial least squares regression (PLSR) followed by a “variable selection” step: the selection of the most informative variables on the basis of the value of the variable importance projection (VIP) (62). PLSR is less prone to overfitting than standard linear algorithms, especially in the case of multi-collinearity (the situation in which variables used to construct a model are highly correlated) because PLSR relies on principal directions rather than individual variables. The use of variable selection ensures that models are easy to interpret by removing many different measurements having low statistical weights.

To validate individual PLSR models and evaluate prediction quality (as measured by  $q^2$  values) we performed leave-one-out cross-validation. In the context of the current data set, which has a limited number of samples, both leave-one-out and ten-fold cross-validation are commonly accepted methods of validation (63). Here, clustering revealed 3 or 4 clusters and some outliers (Fig. 1 and 2, respectively), which implies a need for a minimum of one cell line per cluster plus an outlier (that is 4 or 5 lines) in the test set for proper stratification. However, the total number cell lines for which we have  $GI_{50}$  data for any particular drug (which we derived from the literature) is between 20 and 30, which is insufficient for ten-fold cross validation ( $30/10 < 5$ ). To avoid artifacts from arbitrary partitioning, we used leave-one-out cross-validation. A comparison of predicted and measured  $GI_{50}$  values yielded a correlation coefficient and a  $p$ -value, on the basis of which the significance of the prediction could be judged; we used  $p < 0.05$  as a cutoff. The false discovery rate (FDR) was set at 0.15, but the models discussed in detailed in the text (for ErbB-targeted and PI3K/Akt pathway-targeted inhibitors) remained significant even at FDR=0.05.

We optimized the VIP value cutoff for the variable selection internally to the training set using nested cross-validation (64). Overfitting is a concern for this type of optimization process given the small size of the dataset. However, we obtained similar results in terms of variable coefficients and  $q^2$  using PLSR algorithms with and without variable selection. Moreover, the same variables were generally selected across different iterations of the leave-one-out cross-

validation process. Thus, we believe that the PLSR modeling and VIP selection procedures that we used are robust to overfitting.

### ***Details of the algorithm***

For each drug and dataset, one cell line is left out (Fig. S5A). With the remaining cell lines, a model is build using PLSR with variables selected according to their VIP values. The number of principal components and the cutoff for the variable selection is optimized through a nested leave-one-out cross validation (Fig. S5B). The model developed is then used to predict the response of the left out cell line (Fig. S5C). The different steps of the algorithm, assuming  $n$  cell lines labeled A, B ... N, are:

1. Cell line A is left out; the remaining  $(n-1)$  cell lines are used to build a model.
2. To optimize the model and reduce overfitting, the following nested leave-1-out cross-validation is performed:
  - a. Cell line B is left out and a PLSR model is built on the  $(n-2)$  remaining cell lines using  $\alpha$  principal components.
  - b. The VIP values from the PLSR model of step 2a are calculated (62).
  - c. A reduced model of the  $(n-2)$  cell lines is built using  $\beta$  principal components and only the variables with a VIP value above a given threshold  $\theta$ .
  - d. The model is used to predict the left out cell line B resulting in a predicted value  $B(\alpha, \beta, \theta)$  for cell line B using the  $\alpha$  principal component from step a and the  $\beta$  component from step 2c and with  $\theta$  from step c as a threshold for VIP.
  - e. Steps 2a-d are looped for each cell line C, D ... N. The prediction quality (measured as the  $q^2$ ) for the  $(n-1)$  cell lines can be evaluated as  $q^2(\alpha, \beta, \theta)$ . Values of  $\alpha$  and  $\beta$  are scanned from 1 to 15 and  $\theta$  is scanned from 0 to 3.5 with 0.05 steps resulting in a landscape of  $q^2$  values.
  - f. The optimal parameters based on the nested cross-validation across the  $(n-1)$  cell lines are defined as the triplet  $(\bar{\alpha}, \bar{\beta}, \bar{\theta})$  for which:
    - $\bar{\theta} = \max(\{\theta \mid q^2(\alpha, \beta, \theta) \text{ is in the top 1\% of all measured } q^2\})$
    - $(\bar{\alpha}, \bar{\beta}) = \operatorname{argmax}_{\alpha, \beta} (q^2(\alpha, \beta, \bar{\theta}))$
3. A model based on cell lines B, C ...N and on the parameters derived in step 2f is used to predict the value for cell line A.

4. The steps 1-3 are looped across all cell lines B, C ... N.
5. The final  $q^2$  is derived from the predicted values for all cell lines (step 3).

The final models as reported in Figure 3A and Data S3-5 are built with the same optimization scheme (step 2), but including all the cell lines.

To assess statistical significance, we use the  $p$ -value of the Pearson's correlation between the predicted  $GI_{50}$  values (through the cross-validation) and their measured values. We also report the Pearson's R in the Data S3-5. Calculating the Pearson's  $r$  provides a similar significance to a test based on randomization of the dataset, but can be evaluated analytically and is computationally less demanding than are randomized tests. The correlation approach is also more robust than randomization because, for some drugs, multiple cell lines exhibit the same  $GI_{50}$  value (in many cases due to limitations of the drug response assay (20)), which can bias the randomization.

All code is written in MATLAB using the standard embedded functions, such as "simpls" for building the PLSR model.

[INSERT FIGURE S1]

**Fig. S1. Experimental design and illustration of the collected datasets.** (A) A panel of 43 cell lines are characterized by measuring (B) their steady state levels, their response to 15 growth factors at three time points using (C) ELISA (pAKT and pERK) or (D) high throughput microscopy (pAKT, pERK, pJNK and pP38), and (E) their response to seven cytokines by high throughput microscopy (pERK, pSTAT1, pSTAT3, and NF- $\kappa$ B localization). Response of these cell lines to 43 different kinase inhibitors has been measured independently (F).

[INSERT FIGURE S2]

**Fig. S2. Correlation among basal levels of phosphorylated RTKs and intracellular kinases.** (A) Spearman's correlation between pairs of phosphorylated RTKs and kinases across 39 cell lines. (B) Projection of the amount of pIGF1R versus the amount of pErbB2 for all cell lines. (C) Spearman's correlation between pairs of selected measures across HER2<sup>amp</sup> cell lines.

[INSERT FIGURE S3]

**Fig. S3. Loading and variance of the principal components of the PCA of the basal profiles.**

**(A)** Coefficients of the first two principal components of the PCA of the basal levels. These measurements are the most variable across the cell lines and can be used to segregate the different clusters in Fig. 1D. **(B)** Variance captured in the first ten principal components.

[INSERT FIGURE S4]

**Fig. S4. Correlation between the ligand responses measured by ELISA and high throughput microscopy.** (A) Distribution of the Pearson's correlation coefficients  $r$  for the different responses. (B-D) Representative graphs of how well the results obtained by ELISA and high-throughput imaging (HTM) observed among ligand-induced responses correlated: (B) an example of one of the least correlated responses to a ligand in all tested cell lines, (C) an example of an intermediate correlated response, (D) an example of a highly correlated response. Each dot represents the response for a particular cell line.

[INSERT FIGURE S5]

**Fig. S5. Description of the leave-one-out PLSR algorithm used for prediction.** (A) Measurements across cell lines are used to predict drug response measured as *GI50*. (B) For each drug, the quality of the prediction of the *GI50* for each cell line is assessed by hiding the measurements for a cell line and building a PLSR model to fit the remaining cell lines (optimization of the model is performed through a nested cross-validation, not shown in the figure). (C) The *GI50* of the left out cell line is predicted with the model. (D) For each cell line, the error of the prediction is recorded to evaluate the  $q^2$  (measure of the quality of the prediction) and the p-value (significance of the model). (E) A final model is generated and (F) with its corresponding fit. (G) This process is repeated for each of the 43 drugs.

[INSERT FIGURE S6]

**Fig. S6. Correlation between predictions made with ligand responses measured by ELISA or imaging.** (A) Distribution of the  $q^2$  for drugs for which significant predictions were obtained with the signaling profile measured by ELISA or high-throughput microscopy (HTM). Non-significant predictions (NS) are set to the value zero. Colors represent different classes of drugs targeting different groups of proteins: ErbB, ErbB1 or ErbB2; other RTK, RTKs not in the ErbB family; AKTp, the PI3K/AKT pathway; MAPKp, the MAPK pathway; CC, regulators of the cell cycle; HDAC, Histone deacetylases. (B) Coefficients of the variables for drugs targeting the PI3K/Akt pathway that can be significantly predicted with models based on the signaling profile (maximal response across the three measured time points, see table S7). \* indicates models based on binarized data that are more predictive than models based on non-binarized data. See data S4 for the values of the model coefficients.

[INSERT FIGURE S7]

**Fig. S7. Coefficients of the models based on the signaling profiles for drugs targeting the PI3K/Akt pathway. (A)** Coefficients of the variables for the models predictive of drugs targeting the PI3K/Akt pathway and based on the signaling profile obtained using the maximum response across the three time points (see table S7 for dataset description). A dark blue means that the variable is a strong sensitivity marker. \* indicates models based on binarized data (i.e. significant responses, see table S7) that are more predictive than models based on non-binarized data. See data S2 for the values of the model coefficients. **(B)** Same as (A) for the models based on the ligand responses measured by ELISA (see data S3). Note that variables on the x-axis are different than in (A).

[INSERT FIGURE S8]

**Fig. S8. Distribution of model variables in each cluster for the Lapatinib network**

**representation.** Distribution of the model variables for the cell lines that were part of the resistant cluster R1 (in red) or were part of the sensitive clusters S1 (blue) and S2 (purple). For R1, the box plot illustrates the 10-90% range (line), the interquartile (box) and the median (black bar); a collapsed box (e.g. pErbB3) means that more than 75% of the cell lines are below the detection threshold for the given variable; for S1 and S2, the box represents the full range and the line is the median.

**Table S1. Names, abbreviations, and UNIPROT ids of the proteins mentioned in the paper.**

| Protein name                                                                                    | Abbreviation | UNIPROT ID             |
|-------------------------------------------------------------------------------------------------|--------------|------------------------|
| RAC-alpha serine/threonine-protein kinase                                                       | Akt          | <a href="#">P31749</a> |
| Mitogen-activated protein kinase 3                                                              | Erk          | <a href="#">P27361</a> |
| Phosphatidylinositol 3,4,5-trisphosphate 3-phosphatase and dual-specificity protein phosphatase | PTEN         | <a href="#">P60484</a> |
| Receptor tyrosine-protein kinase erbB-2                                                         | ErbB2        | <a href="#">P04626</a> |
| RAF proto-oncogene serine/threonine-protein kinase                                              | Raf          | <a href="#">P04049</a> |
| Estrogen receptor                                                                               | ER           | <a href="#">Q16405</a> |
| Progesterone receptor                                                                           | PR           | <a href="#">P06401</a> |
| Epidermal growth factor receptor                                                                | ErbB1        | <a href="#">P00533</a> |
| Receptor tyrosine-protein kinase erbB-3                                                         | ErbB3        | <a href="#">P21860</a> |
| Receptor tyrosine-protein kinase erbB-4                                                         | ErbB4        | <a href="#">Q15303</a> |
| Hepatocyte growth factor receptor                                                               | c-Met        | <a href="#">P08581</a> |
| Insulin-like growth factor 1 receptor                                                           | IGF1R        | <a href="#">P08069</a> |
| Platelet-derived growth factor receptor beta                                                    | PDGFR        | <a href="#">P05622</a> |
| Vascular endothelial growth factor receptor 1                                                   | VEGFR1       | <a href="#">P17948</a> |
| Vascular endothelial growth factor receptor 2                                                   | VEGFR2       | <a href="#">P35968</a> |
| Vascular endothelial growth factor receptor 3                                                   | VEGFR3       | <a href="#">P35916</a> |
| Mast/stem cell growth factor receptor Kit                                                       | c-Kit        | <a href="#">P10721</a> |
| Insulin receptor                                                                                | InsR         | <a href="#">P06213</a> |
| Fibroblast growth factor receptor 4                                                             | FGFR4        | <a href="#">P22455</a> |
| Interleukin-6 receptor subunit alpha                                                            | IL6R         | <a href="#">P08887</a> |
| Signal transducer and activator of transcription 1-alpha/beta                                   | STAT1        | <a href="#">P42224</a> |
| Signal transducer and activator of transcription 3                                              | STAT3        | <a href="#">P40763</a> |

**Table S2. Cell lines and culture conditions.**

| Cell Line         | Subtype | Growth Medium used in this study                                                            | ATCC recommendation (if different)        | T    | CO2  |
|-------------------|---------|---------------------------------------------------------------------------------------------|-------------------------------------------|------|------|
| <b>BT-20</b>      | TNBC    | EMEM + 10% heat Inactivated FBS + 1% P/S                                                    |                                           | 37°C | 5%   |
| <b>CAMA-1</b>     | HR+     | EMEM + 10% heat Inactivated FBS + 1% P/S                                                    |                                           | 37°C | 5%   |
| <b>MCF7</b>       | HR+     | DMEM + 10% heat Inactivated FBS + 1% P/S                                                    | EMEM + 0.01 mg/ml bovine insulin +10% FBS | 37°C | 5%   |
| <b>AU-565</b>     | HER2amp | RPMI-1640 Medium + 10% heat Inactivated FBS + 1% P/S                                        |                                           | 37°C | 5%   |
| <b>HCC-38</b>     | TNBC    | RPMI-1640 Medium + 10% heat Inactivated FBS + 1% P/S                                        |                                           | 37°C | 5%   |
| <b>HCC-70</b>     | TNBC    | RPMI-1640 Medium + 10% heat Inactivated FBS + 1% P/S                                        |                                           | 37°C | 5%   |
| <b>HCC-202</b>    | HER2amp | RPMI-1640 Medium + 10% heat Inactivated FBS + 1% P/S                                        |                                           | 37°C | 5%   |
| <b>HCC-1187</b>   | TNBC    | RPMI-1640 Medium + 10% heat Inactivated FBS + 1% P/S                                        |                                           | 37°C | 5%   |
| <b>HCC-1395</b>   | TNBC    | RPMI-1640 Medium + 10% heat Inactivated FBS + 1% P/S                                        |                                           | 37°C | 5%   |
| <b>HCC-1419</b>   | HER2amp | RPMI-1640 Medium + 10% heat Inactivated FBS + 1% P/S                                        |                                           | 37°C | 5%   |
| <b>HCC-1500</b>   | HR+     | RPMI-1640 Medium + 10% heat Inactivated FBS + 1% P/S                                        |                                           | 37°C | 5%   |
| <b>HCC-1428</b>   | HR+     | RPMI-1640 Medium + 10% heat Inactivated FBS + 1% P/S                                        |                                           | 37°C | 5%   |
| <b>HCC-1569</b>   | HER2amp | RPMI-1640 Medium + 10% heat Inactivated FBS + 1% P/S                                        |                                           | 37°C | 5%   |
| <b>HCC-1806</b>   | TNBC    | RPMI-1640 Medium + 10% heat Inactivated FBS + 1% P/S                                        |                                           | 37°C | 5%   |
| <b>HCC-1937</b>   | TNBC    | RPMI-1640 Medium + 10% heat Inactivated FBS + 1% P/S                                        |                                           | 37°C | 5%   |
| <b>HCC-1954</b>   | HER2amp | RPMI-1640 Medium + 10% heat Inactivated FBS + 1% P/S                                        |                                           | 37°C | 5%   |
| <b>ZR-75-1</b>    | HR+     | RPMI-1640 Medium + 10% heat Inactivated FBS + 1% P/S                                        |                                           | 37°C | 5%   |
| <b>ZR-75-30</b>   | HER2amp | RPMI-1640 Medium + 10% heat Inactivated FBS + 1% P/S                                        |                                           | 37°C | 5%   |
| <b>SK-BR-3</b>    | HER2amp | McCoy's 5a Medium + 10% heat Inactivated FBS + 1% P/S                                       |                                           | 37°C | 5%   |
| <b>MCF-10A</b>    | TNBC    | MEBM (Lonza/Clonetics, MEGM, Kit Cat No. CC-3150)<br>100 ng/ml cholera toxin, Do not filter |                                           | 37°C | 5%   |
| <b>MDA-MB-231</b> | TNBC    | Leibovitz's L-15 Medium +10% FBS (no Heat-Inactivated) + 1% P/S                             |                                           | 37°C | none |
| <b>MDA-MB-157</b> | TNBC    | Leibovitz's L-15 Medium +10% FBS (no Heat-Inactivated) + 1% P/S                             |                                           | 37°C | none |

|                      |         |                                                                                                                                                                                                                                        |                                                               |      |      |
|----------------------|---------|----------------------------------------------------------------------------------------------------------------------------------------------------------------------------------------------------------------------------------------|---------------------------------------------------------------|------|------|
| <b>MDA-MB-175VII</b> | HR+     | Leibovitz's L-15 Medium +10% FBS (no Heat-Inactivated) + 1% P/S                                                                                                                                                                        |                                                               | 37°C | none |
| <b>MDA-MB-453</b>    | TNBC    | Leibovitz's L-15 Medium +10% FBS (no Heat-Inactivated) + 1% P/S                                                                                                                                                                        |                                                               | 37°C | none |
| <b>MDA-MB-468</b>    | TNBC    | Leibovitz's L-15 Medium +10% FBS (no Heat-Inactivated) + 1% P/S                                                                                                                                                                        |                                                               | 37°C | none |
| <b>UACC-893</b>      | HER2amp | Leibovitz's L-15 Medium +10% FBS (no Heat-Inactivated) + 1% P/S                                                                                                                                                                        |                                                               | 37°C | none |
| <b>184-B5</b>        | TNBC    | MEBM (Lonza/Clonetics as a kit: MEGM, Kit Cat No. CC-3150)<br>1 ng/ml cholera toxin, Do not filter                                                                                                                                     |                                                               | 37°C | 5%   |
| <b>BT-483</b>        | HR+     | RPMI-1640 Medium + 20% heat Inactivated FBS + 1% P/S<br>0.01 mg/ml bovine insulin                                                                                                                                                      |                                                               | 37°C | 5%   |
| <b>BT-549</b>        | TNBC    | RPMI-1640 Medium + 10% heat Inactivated FBS + 1% P/S<br>0.023 IU/ml insulin                                                                                                                                                            |                                                               | 37°C | 5%   |
| <b>T47D</b>          | HR+     | RPMI-1640 Medium + 10% heat Inactivated FBS + 1% P/S<br>0.2 Units/ml bovine insulin                                                                                                                                                    |                                                               | 37°C | 5%   |
| <b>Hs 578T</b>       | TNBC    | DMEM + 10% heat Inactivated FBS + 1% P/S<br>0.01 mg/ml bovine insulin                                                                                                                                                                  |                                                               | 37°C | 5%   |
| <b>MDA-MB-134VI</b>  | HR+     | Leibovitz's L-15 Medium + 20% Fetal Bovine Serum (no Heat-Inactivated) + 1% P/S                                                                                                                                                        |                                                               | 37°C | none |
| <b>MDA-MB-361</b>    | HER2amp | Leibovitz's L-15 Medium + 20% Fetal Bovine Serum (no Heat-Inactivated) + 1% P/S                                                                                                                                                        |                                                               | 37°C | none |
| <b>BT-474</b>        | HER2amp | RPMI-1640 Medium + 10% heat Inactivated FBS + 1% P/S                                                                                                                                                                                   | ATCC Hybri-Care Medium + 10% FBS + 1.5 g/L sodium bicarbonate | 37°C | 5%   |
| <b>UACC-812</b>      | HER2amp | Leibovitz's L-15 medium + 20% FBS (no Heat-Inactivated) + 1% P/S<br>2 mM L-glutamine<br>20 ng/ml human EGF                                                                                                                             |                                                               | 37°C | none |
|                      |         |                                                                                                                                                                                                                                        |                                                               |      |      |
| <b>MCF 10F</b>       | TNBC    | 1:1 mixture of DMEM and Ham's F12 (+ L-glutamine + 15mM Hepes, Gibco, Cat# 11330)<br>20 ng/ml Human epidermal growth factor<br>100 ng/ml cholera toxin<br>0.01 mg/ml bovine insulin<br>500 ng/ml hydrocortisone, 95%<br>5% horse serum |                                                               | 37°C | 5%   |
| <b>MCF-12A</b>       | TNBC    | 1:1 mixture of DMEM and Ham's F12 (+ L-glutamine + 15mM Hepes, Gibco, Cat# 11330)                                                                                                                                                      |                                                               | 37°C | 5%   |

|                   |      |                                                                                                                                                   |                                                                                                                                    |      |      |
|-------------------|------|---------------------------------------------------------------------------------------------------------------------------------------------------|------------------------------------------------------------------------------------------------------------------------------------|------|------|
|                   |      | 20 ng/ml Human epidermal growth factor<br>100 ng/ml cholera toxin<br>0.01 mg/ml bovine insulin<br>500 ng/ml hydrocortisone, 95%<br>5% horse serum |                                                                                                                                    |      |      |
| <b>MDA-MB-436</b> | TNBC | Leibovitz's L-15 medium + 10% FBS (no Heat-Inactivated) + 1% P/S<br>10 mg/l insulin                                                               | Leibovitz's L-15 medium + 10% FBS (no Heat-Inactivated) + 1% P/S<br>10 mg/l insulin<br>16 mg/l glutathione, 90%                    | 37°C | none |
| <b>MDA-MB-415</b> | HR+  | Leibovitz's L-15 medium + 15% FBS (no Heat-Inactivated) + 1% P/S<br>2mM L-glutamine<br>10 mg/l insulin                                            | Leibovitz's L-15 medium + 15% FBS (no Heat-Inactivated) + 1% P/S<br>2mM L-glutamine<br>10 mg/l insulin<br>10 mg/l glutathione, 85% | 37°C | none |
| <b>DU-4475</b>    |      | RPMI-1640 Medium + 10% heat Inactivated FBS + 1% P/S                                                                                              |                                                                                                                                    | 37°C | 5%   |
| <b>HCC-2218</b>   |      | RPMI-1640 Medium + 10% heat Inactivated FBS + 1% P/S                                                                                              |                                                                                                                                    | 37°C | 5%   |
|                   |      |                                                                                                                                                   |                                                                                                                                    |      |      |
| <b>HCC-2157</b>   |      | RPMI-1640 Medium + 10% heat Inactivated FBS + 1% P/S<br>0.02mg/ml Insulin<br>50nM Hydrocortisone<br>1ng/ml EGF                                    |                                                                                                                                    | 37°C | 5%   |
| <b>HCC-1599</b>   |      | RPMI-1640 Medium + 10% heat Inactivated FBS + 1% P/S                                                                                              |                                                                                                                                    | 37°C | 5%   |

**Table S3. Description of the ELISA kits used for measuring the basal profiles.**

| <b>Receptor Family</b> | <b>Abbreviation</b> | <b>capture antibody vendor and label</b> | <b>epitope</b>           | <b>source animal</b> | <b>detection antibody vendor and label</b> | <b>epitope</b>           | <b>source animal</b> |
|------------------------|---------------------|------------------------------------------|--------------------------|----------------------|--------------------------------------------|--------------------------|----------------------|
| -                      | ERK                 | Cell Signaling Technologies 7050         | Total ERK1<br>Total ERK2 | mouse                | Cell Signaling Technologies 7050           | Total ERK1<br>Total ERK2 | rabbit               |
| -                      | Akt                 | Cell Signaling Technologies 7142         | Total Akt                | rabbit               | Cell Signaling Technologies 7142           | Total Akt1               | mouse                |
| <b>ErbB</b>            | EGFR                | R&D Systems AF231                        | Total EGFR               | goat                 | R&D Systems BAF231                         | Total EGFR               | goat                 |
| <b>ErbB</b>            | ErbB2               | R&D Systems MAB1129                      | Total ErbB2              | mouse                | R&D Systems BAF1129                        | Total ErbB2              | goat                 |
| <b>ErbB</b>            | ErbB3               | R&D Systems MAB3481                      | Total ErbB3              | mouse                | R&D Systems BAM348                         | Total ErbB3              | mouse                |
| <b>ErbB</b>            | ErbB4               | R&D Systems DYC1133                      | Total ErbB4              | mouse                | R&D Systems DYC1133                        | Total ErbB4              | mouse                |
| <b>InsR</b>            | InsR                | R&D Systems DYC1544                      | Total Insulin R          | mouse                | R&D Systems DYC1544                        | Total Insulin R          | mouse                |
| <b>InsR</b>            | IGF1R               | R&D Systems DYC305                       | Total IGF1R              | mouse                | R&D Systems DYC305                         | Total IGF1R              | goat                 |
| <b>InsR</b>            | IGF2R               | R&D Systems DY2447                       | Total IGF2R              | mouse                | R&D Systems DY2447                         | Total IGF2R              | goat                 |
| <b>VEGFR</b>           | VEGFR1              | R&D Systems DYC4347                      | Total VEGFR1             | mouse                | R&D Systems DYC4347                        | Total VEGFR1             | goat                 |
| <b>VEGFR</b>           | VEGFR2              | R&D Systems DYC1780                      | Total VEGFR2             | mouse                | R&D Systems DYC1780                        | Total VEGFR2             | goat                 |
| <b>VEGFR</b>           | VEGFR3              | R&D Systems DYC3491                      | Total VEGFR3             | mouse                | R&D Systems DYC3491                        | Total VEGFR3             | mouse                |
| <b>PDGFR</b>           | PDGFRa              | Cell Signaling Technologies 7264         | Total PDGFRa             | rabbit               | Cell Signaling Technologies 7264           | Total PDGFRa             | mouse                |
| <b>PDGFR</b>           | PDGFRb              | R&D Systems DYC385                       | Total PDGFRb             | mouse                | R&D Systems DYC385                         | Total PDGFRb             | goat                 |
| <b>Met</b>             | Met                 | Invitrogen CHO0285                       | Total Met                | unknown              | Invitrogen CHO0285                         | Total Met                | rabbit               |
| <b>ckit</b>            | ckit                | R&D Systems DY332                        | Total ckit               | mouse                | R&D Systems DY332                          | Total ckit               | goat                 |
| <b>EphA2</b>           | EphA2               | R&D Systems DYC3035                      | Total EphA2              | mouse                | R&D Systems DYC3035                        | Total EphA2              | goat                 |
| <b>Src</b>             | Src                 | R&D Systems 7992                         | Total Src                | rabbit               | R&D Systems 7992                           | Total Src                | mouse                |
| <b>TrkA</b>            | TrkA                | R&D Systems DYC175                       | Total TrkA               | mouse                | R&D Systems DYC175                         | Total TrkA               | mouse                |
| <b>FGFR</b>            | FGFR1               | Merrimack A1                             | Total FGFR1              | human                | Merrimack H7                               | Total FGFR1              | human                |
| <b>FGFR</b>            | FGFR2               | R&D Systems DYC665                       | Total FGFR2              | mouse                | R&D Systems DYC665                         | Total FGFR2              | mouse                |
| <b>FGFR</b>            | FGFR3               | R&D Systems DYC766                       | Total FGFR3              | mouse                | R&D Systems DYC766                         | Total FGFR3              | mouse                |
| <b>FGFR</b>            | FGFR4               | R&D Systems DYC685                       | Total FGFR4              | mouse                | R&D Systems DYC685                         | Total FGFR4              | rat                  |
| <b>EpCa</b>            | EpCAM               | R&D Systems DY960                        | Total EpCAM              | mouse                | R&D Systems DY960                          | Total EpCAM              | goat                 |

|              |                    |                                     |                                                                    |        |                                     |                                                                    |        |
|--------------|--------------------|-------------------------------------|--------------------------------------------------------------------|--------|-------------------------------------|--------------------------------------------------------------------|--------|
| -            | ppERK (pErk R&D) * | R&D Systems<br>DYC1018              | Total ERK1<br>Total ERK2                                           | goat   | R&D Systems<br>DYC1018              | Phospho-ERK1<br>(Thr202/Tyr204)<br>Phospho-ERK2<br>(Thr185/Tyr187) | rabbit |
| -            | pERK (pErk CST) ** | Cell Signaling<br>Technologies 7246 | Phospho-ERK1<br>(Thr202/Tyr204)<br>Phospho-ERK2<br>(Thr185/Tyr187) | rabbit | Cell Signaling<br>Technologies 7246 | Total ERK1<br>Total ERK2                                           | mouse  |
| -            | pAkt               | Millipore 05-591MG                  | Akt1 PH Domain                                                     | mouse  | Cell Signaling<br>Technologies 5102 | Phospho-Akt<br>(Ser473)                                            | mouse  |
| <b>ErbB</b>  | pEGFR              | R&D Systems AF231                   | Total EGFR                                                         | goat   | Millipore 16-452                    | Phosphotyrosine                                                    | mouse  |
| <b>ErbB</b>  | pErbB2             | R&D Systems<br>MAB1129              | Total ErbB2                                                        | mouse  | Millipore 16-452                    | Phosphotyrosine                                                    | mouse  |
| <b>ErbB</b>  | pErbB3             | R&D Systems<br>MAB3481              | Total ErbB3                                                        | mouse  | Millipore 16-452                    | Phosphotyrosine                                                    | mouse  |
| <b>ErbB</b>  | pErbB4             | R&D Systems<br>DYC2115              | Total ErbB4                                                        | mouse  | Millipore 16-452                    | Phosphotyrosine                                                    | mouse  |
| <b>InsR</b>  | pInsR              | R&D Systems<br>DYC2718              | Total Insulin R                                                    | mouse  | Millipore 16-452                    | Phosphotyrosine                                                    | mouse  |
| <b>InsR</b>  | pIGF1R             | R&D Systems<br>DYC1770              | Total IGF1R                                                        | mouse  | Millipore 16-452                    | Phosphotyrosine                                                    | mouse  |
| <b>InsR</b>  | pIGF1R-<br>Y1131   | Cell Signaling<br>Technologies 7820 | Phospho-IGF1R<br>(Tyr1131)                                         | rabbit | Cell Signaling<br>Technologies 7820 | Total IGF1R                                                        | mouse  |
| <b>VEGFR</b> | pVEGFR1            | R&D Systems<br>DYC4170              | Total VEGFR1                                                       | mouse  | Millipore 16-452                    | Phosphotyrosine                                                    | mouse  |
| <b>VEGFR</b> | pVEGFR2            | R&D Systems<br>DYC1766              | Total VEGFR2                                                       | mouse  | Millipore 16-452                    | Phosphotyrosine                                                    | mouse  |
| <b>VEGFR</b> | pVEGFR3            | R&D Systems<br>DYC2724              | Total VEGFR3                                                       | mouse  | Millipore 16-452                    | Phosphotyrosine                                                    | mouse  |
| <b>PDGFR</b> | pPDGFRa            | R&D Systems<br>DYC2114              | Total PDGFRa                                                       | mouse  | Millipore 16-452                    | Phosphotyrosine                                                    | mouse  |
| <b>PDGFR</b> | pPDGFRb            | R&D Systems<br>DYC1767              | Total PDGFRb                                                       | mouse  | Millipore 16-452                    | Phosphotyrosine                                                    | mouse  |
| <b>Met</b>   | pMet               | R&D Systems<br>DYC2480              | Total Met                                                          | goat   | Millipore 16-452                    | Phosphotyrosine                                                    | mouse  |
| <b>ckit</b>  | pckit              | R&D Systems<br>DYC3527              | Total ckit                                                         | rat    | Millipore 16-452                    | Phosphotyrosine                                                    | mouse  |
| <b>EphA2</b> | pEphA2             | R&D Systems<br>DYC4056              | Total EphA2                                                        | mouse  | Millipore 16-452                    | Phosphotyrosine                                                    | mouse  |
| <b>Src</b>   | pSrc               | R&D Systems<br>DYC2685              | Total Src                                                          | goat   | R&D Systems<br>DYC2685              | Phospho-Src<br>(Y419)                                              | rabbit |
| <b>TrkA</b>  | pTrkA              | R&D Systems<br>DYC2578              | Total TrkA                                                         | mouse  | Millipore 16-452                    | Phosphotyrosine                                                    | mouse  |
| <b>HR</b>    | ER                 | R&D Systems<br>DYC5715              | Total ER alpha                                                     | sheep  | R&D Systems<br>DYC5715              | Total ER alpha                                                     | sheep  |
| <b>HR</b>    | PR                 | R&D Systems<br>DYC5415              | Total PR                                                           | sheep  | R&D Systems<br>DYC5415              | Total PR                                                           | sheep  |

\* assay measures exclusively doubly phosphorylated form of ERK1 and ERK2

\*\* assay measures singly and doubly phosphorylated forms of ERK1 and ERK2

**Table S4. Description of ligands used for the measuring the signaling profiles.**

| <b>Ligand Family</b>       | <b>Ligand name</b>                   | <b>Abbreviation</b> | <b>vendor/catalog no.</b> | <b>UniProt id</b> | <b>Stock concentration</b> |
|----------------------------|--------------------------------------|---------------------|---------------------------|-------------------|----------------------------|
| <b>ErbB</b>                | Epidermal Growth Factor              | EGF                 | Peprtech AF-100-15        | P01133            | 100µg/ml                   |
| <b>ErbB</b>                | Epiregulin                           | EPR                 | Peprtech 100-04           | O14944            | 100µg/ml                   |
| <b>ErbB</b>                | Betacellulin                         | BTC                 | Peprtech 100-50           | P35070            | 100µg/ml                   |
| <b>ErbB</b>                | Heregulin β1                         | HRG                 | Peprtech 100-03           | Q02297            | 100µg/ml                   |
| <b>Ins-IGF</b>             | Insulin                              | INS                 | Sigma I9278               | P01308            | 100µg/ml                   |
| <b>Ins-IGF</b>             | Insulin-like Growth Factor 1         | IGF-1               | Peprtech 100-11           | P05019            | 100µg/ml                   |
| <b>Ins-IGF</b>             | Insulin-like Growth Factor 2         | IGF-2               | Peprtech 100-12           | P01344            | 100µg/ml                   |
| <b>PDGF</b>                | Platelet Derived Growth Factor BB    | PDGF-BB             | Peprtech 100-14B          | P01127            | 100µg/ml                   |
| <b>HGF</b>                 | Hepatocyte Growth Factor             | HGF                 | Peprtech 100-39           | P14210            | 100µg/ml                   |
| <b>SCF</b>                 | Stem Cell Factor                     | SCF                 | Peprtech 300-07           | P21583            | 100µg/ml                   |
| <b>FGF</b>                 | Fibroblast Growth Factor (acidic)    | FGF-1               | Peprtech 100-17A          | P05230            | 100µg/ml                   |
| <b>FGF</b>                 | Fibroblast Growth Factor (basic)     | FGF-2               | Peprtech 100-18B          | P09038            | 100µg/ml                   |
| <b>NGF</b>                 | Nerve Growth Factor                  | NGF-beta            | Peprtech 450-01           | P01138            | 100µg/ml                   |
| <b>EFNA</b>                | Ephrin-A1                            | EFNA1               | R&D 602-A1-200            | P20827            | 100µg/ml                   |
| <b>VEGF</b>                | Vascular endothelial growth factor A | VEGF165             | Peprtech 100-20           | P15692            | 100µg/ml                   |
| <b>Interleukin</b>         | Interleukin 1                        | IL-1 alpha          | Peprtech 200-01A          | P01583            | 100µg/ml                   |
| <b>Interleukin</b>         | Interleukin 2                        | IL-2                | Peprtech 200-02           | P60568            | 100µg/ml                   |
| <b>Interleukin</b>         | Interleukin 6                        | IL-6                | Peprtech 200-06           | P05231            | 100µg/ml                   |
| <b>Interferon receptor</b> | Interferon-α *                       | IFN-alpha           | R&D 11200-2               | P01562 / P01563   | 10E6 U/ml stock            |
| <b>Interferon receptor</b> | Interferon-γ                         | IFN-gamma           | Peprtech 300-02           | P01579            | 100µg/ml                   |
| <b>Toll-like receptor</b>  | Lipopolysaccharide                   | LPS                 | Invivogen tlr1-pelps      |                   | 100µg/ml                   |
| <b>TNF receptors</b>       | Tumor Necrosis Factor-α              | TNF-a               | Peprtech 300-01A          | P01375            | 100µg/ml                   |

\* Mix of IFN alpha-A and IFN alpha-D

**Table S5. Description of the antibodies used for the high-throughput microscopy imaging assays.** Shading indicates antibodies used in experiments for predicting drug response.

| antibody vendor and label          | epitope                                                 | source animal | secondary antibody                                               | Assay               |
|------------------------------------|---------------------------------------------------------|---------------|------------------------------------------------------------------|---------------------|
| Cell Signaling Technologies 9106BC | Phospho-p44/42 MAPK (Erk1/2) (Thr202/Tyr204)            | mouse         | Alexa Fluor 488 Donkey Anti-Mouse IgG (Invitrogen A21202)        | Cytokines (CK)      |
| Cell Signaling Technologies 9167BC | Phospho-Stat1 (Tyr701)                                  | rabbit        | Alexa Fluor 488 Donkey Anti-Rabbit IgG (H+L) (Invitrogen A21206) | Cytokines (CK)      |
| Cell Signaling Technologies 9145BC | Phospho-Stat3 (Tyr705)                                  | rabbit        | Alexa Fluor 488 Donkey Anti-Rabbit IgG (H+L) (Invitrogen A21206) | Cytokines (CK)      |
| Santa Cruz Biotechnology sc-8008   | amino acids 1-286 mapping at the N-terminus of NFκB p65 | mouse         | Alexa Fluor 488 Donkey Anti-Mouse IgG (Invitrogen A21202)        | Cytokines (CK)      |
| Cell Signaling Technologies 9106BC | Phospho-p44/42 MAPK (Erk1/2) (Thr202/Tyr204)            | mouse         | Alexa Fluor 647 Donkey Anti-Mouse IgG (H+L) (Invitrogen A31571)  | Cytokines (CK)      |
| Cell Signaling Technologies 9167BC | Phospho-Stat1 (Tyr701)                                  | rabbit        | Alexa Fluor 647 Donkey Anti-Rabbit IgG (H+L) (Invitrogen A31573) | Cytokines (CK)      |
| Cell Signaling Technologies 9145BC | Phospho-Stat3 (Tyr705)                                  | rabbit        | Alexa Fluor 647 Donkey Anti-Rabbit IgG (H+L) (Invitrogen A31573) | Cytokines (CK)      |
| Santa Cruz Biotechnology sc-8008   | amino acids 1-286 mapping at the N-terminus of NFκB p65 | mouse         | Alexa Fluor 647 Donkey Anti-Mouse IgG (H+L) (Invitrogen A31571)  | Cytokines (CK)      |
| Cell Signaling Technologies 9106BC | Phospho-p44/42 MAPK (Erk1/2) (Thr202/Tyr204)            | mouse         | Alexa Fluor 488 Donkey Anti-Mouse IgG (Invitrogen A21202)        | Growth factors (GF) |
| Cell Signaling Technologies 4051BC | Phospho-Akt (Ser473)                                    | mouse         | Alexa Fluor 488 Donkey Anti-Mouse IgG (Invitrogen A21202)        | Growth factors (GF) |
| Cell Signaling Technologies 9216BC | Phospho-p38 MAPK (Thr180/Tyr182)                        | mouse         | Alexa Fluor 488 Donkey Anti-Mouse IgG (Invitrogen A21202)        | Growth factors (GF) |
| Cell Signaling Technologies 9255BC | Phospho-SAPK/JNK (Thr183/Tyr185)                        | mouse         | Alexa Fluor 488 Donkey Anti-Mouse IgG (Invitrogen A21202)        | Growth factors (GF) |
| Cell Signaling Technologies 4370BC | Phospho-p44/42 MAPK (Erk1/2) (Thr202/Tyr204)            | rabbit        | Alexa Fluor 647 Donkey Anti-Rabbit IgG (H+L) (Invitrogen A31573) | Growth factors (GF) |
| Cell Signaling Technologies 4060BC | Phospho-Akt (Ser473)                                    | rabbit        | Alexa Fluor 647 Donkey Anti-Rabbit IgG (H+L) (Invitrogen A31573) | Growth factors (GF) |
| Cell Signaling Technologies 4511BC | Phospho-p38 MAPK (Thr180/Tyr182)                        | rabbit        | Alexa Fluor 647 Donkey Anti-Rabbit IgG (H+L) (Invitrogen A31573) | Growth factors (GF) |
| Cell Signaling Technologies 9251BC | Phospho-SAPK/JNK (Thr183/Tyr185)                        | rabbit        | Alexa Fluor 647 Donkey Anti-Rabbit IgG (H+L) (Invitrogen A31573) | Growth factors (GF) |

**Table S6. Descriptions of the datasets used for the prediction of *GI50* values.** See table S4 for the list of ligands used for the experimental results.

| Dataset name                                                                          | Abbreviation  | Measures                                                                                                     | Transformation                                                                                                                                   | Size                                                                                                  |
|---------------------------------------------------------------------------------------|---------------|--------------------------------------------------------------------------------------------------------------|--------------------------------------------------------------------------------------------------------------------------------------------------|-------------------------------------------------------------------------------------------------------|
| <b>Basal profile</b>                                                                  | B             | Basal expression and phosphorylation levels measured by ELISA (see <b>table S3</b> for protein list).        | Each variable is independently normalized between 0 and 1 across all cell lines.                                                                 | 39 cell lines x<br>46 measured proteins<br><br>= 39 x 46 values                                       |
| <b>Binarized Basal profile</b>                                                        | Bin-B         | Basal expression and phosphorylation levels measured by ELISA (see <b>table S4</b> for protein list).        | Each variable is independently binarized, 1 corresponding to a value above the median (removing threshold values).                               | 39 cell lines x<br>46 measured proteins<br><br>= 39 x 46 values                                       |
| <b>Signaling profile (growth factors; average across time points)</b>                 | S(GF)mean     | Measures of pERK, pAKT, pP38 and pJNK after growth factor stimulation (see <b>table S4</b> for ligand list). | The three time points are averaged. Each variable is independently normalized between 0 and 1 across all cell lines.                             | 38 cell lines x<br>4 measured proteins x<br>15 ligands x<br>2 concentrations<br><br>= 38 x 120 values |
| <b>Binarized signaling profile (growth factors; average across time points)</b>       | Bin-S(GF)mean | Measures of pERK, pAKT, pP38 and pJNK after growth factor stimulation (see <b>table S4</b> for ligand list). | Each measure is set to 1 if the response is 3 standard deviations higher than the control, 0 otherwise. The three time points are then averaged. | 38 cell lines x<br>4 measured proteins x<br>15 ligands x<br>2 concentrations<br><br>= 38 x 120 values |
| <b>Signaling profile (growth factors; maximal value across time points)</b>           | S(GF)max      | Measures of pERK, pAKT, pP38 and pJNK after growth factor stimulation (see <b>table S4</b> for ligand list). | The value is the maximum of the three time points. Each variable is independently normalized between 0 and 1 across all cell lines.              | 38 cell lines x<br>4 measured proteins x<br>15 ligands x<br>2 concentrations<br><br>= 38 x 120 values |
| <b>Binarized signaling profile (growth factors; maximal value across time points)</b> | Bin- S(GF)max | Measures of pERK, pAKT, pP38 and pJNK after growth factor stimulation (see <b>table S4</b> for ligand list). | The value is set to 1 if the response at any of the three time points is 3 standard deviations higher than the control, 0 otherwise.             | 38 cell lines x<br>4 measured proteins x<br>15 ligands x<br>2 concentrations<br><br>= 38 x 120 values |

|                                                                                                          |                     |                                                                                                                                                                                                                                                        |                                                                                                                                                                                                                                                                                                                         |                                                                                                                                                            |
|----------------------------------------------------------------------------------------------------------|---------------------|--------------------------------------------------------------------------------------------------------------------------------------------------------------------------------------------------------------------------------------------------------|-------------------------------------------------------------------------------------------------------------------------------------------------------------------------------------------------------------------------------------------------------------------------------------------------------------------------|------------------------------------------------------------------------------------------------------------------------------------------------------------|
| <b>Signaling profile (growth factors and cytokines; average across time points)</b>                      | S(GF+CK)mean        | Measures of pERK, pAKT, pP38 and pJNK after growth factor stimulation and measures of pERK, STAT-1, STAT-3 and NF-kB after cytokine stimulation (see <b>table S4</b> for ligand list).                                                                 | The three time points are averaged. Each variable is independently normalized between 0 and 1 across all cell lines.                                                                                                                                                                                                    | 37 cell lines x<br>4 measured proteins x<br>(15+7) ligands x<br>2 concentrations<br><br>= 37 x 176 values                                                  |
| <b>Binarized signaling profile (growth factors and cytokines; average across time points)</b>            | Bin-S(GF+CK)mean    | Measures of pERK, pAKT, pP38 and pJNK after growth factor stimulation and measures of pERK, STAT-1, STAT-3 and NF-kB after cytokine stimulation (see <b>table S4</b> for ligand list).                                                                 | Each measure is set to 1 if the response is 3 standard deviations higher than the control, 0 otherwise. The three time points are then averaged.                                                                                                                                                                        | 37 cell lines x<br>4 measured proteins x<br>(15+7) ligands x<br>2 concentrations<br><br>= 37 x 176 values                                                  |
| <b>Basal and signaling profiles (growth factors and cytokines; average across time points)</b>           | B+S(GF+CK)mean      | Basal expression and phosphorylation levels measured by ELISA; measures of pERK, pAKT, pP38 and pJNK after growth factor stimulation, and measures of pERK, STAT-1, STAT-3 and NF-kB after cytokine stimulation (see <b>table S4</b> for ligand list). | For the ligand response, the three time points are averaged. Then, each variable is independently normalized between 0 and 1 across all cell lines.                                                                                                                                                                     | 37 cell lines x<br>4 measured proteins x<br>(15+7) ligands x<br>2 concentrations<br><br>+ 37 cell lines x<br>46 measured proteins<br><br>= 37 x 222 values |
| <b>Binarized basal and signaling profiles (growth factors and cytokines; average across time points)</b> | Bin- B+S(GF+CK)mean | Basal expression and phosphorylation levels measured by ELISA; measures of pERK, pAKT, pP38 and pJNK after growth factor stimulation, and measures of pERK, STAT-1, STAT-3 and NF-kB after cytokine stimulation (see <b>table S4</b> for ligand list). | For the basal levels, Each variable is independently binarized, 1 corresponding to a value above the median (removing threshold values). For the ligand response, each measure is set to 1 if the response is 3 standard deviations higher than the control, 0 otherwise. Then the three time points are then averaged. | 37 cell lines x<br>4 measured proteins x<br>(15+7) ligands x<br>2 concentrations<br><br>+ 37 cell lines x<br>46 measured proteins<br><br>= 37 x 222 values |

**Table S7. Enrichment analysis of the GI50 values by *PTEN* and *PI3KCA* mutational status.**

| Drug name    | Median GI50 value for PIK3CA/PTEN WT in log10(M) | Median GI50 value for PIK3CA/PTEN mutant in log10(M) | p-value |
|--------------|--------------------------------------------------|------------------------------------------------------|---------|
| AG1478       | -4.268                                           | -4.569                                               | 0.865   |
| Erlotinib    | -4.773                                           | -4.389                                               | 0.631   |
| Gefitinib    | -4.965                                           | -5.134                                               | 0.556   |
| Afatinib     | -6.016                                           | -6.199                                               | 0.773   |
| Lapatinib    | -4.778                                           | -4.781                                               | 0.667   |
| Triciribine  | -5.622                                           | -5.849                                               | 0.648   |
| A6730 SIGMA  | -5.490                                           | -5.727                                               | 0.427   |
| Rapamycin    | -7.331                                           | -6.921                                               | 0.580   |
| Temsirolimus | -6.300                                           | -6.252                                               | 0.979   |
| BEZ235       | -5.969                                           | -6.231                                               | 0.291   |
| GSK1059615   | -6.263                                           | -6.237                                               | 0.835   |
| GSK2119563   | -6.018                                           | -6.003                                               | 0.819   |
| GSK2126458   | -8.012                                           | -8.051                                               | 0.884   |
| TGX-221      | -4.814                                           | -5.103                                               | 0.293   |
| AS-252424    | -4.875                                           | -4.701                                               | 0.687   |
| GSK1487371   | -5.781                                           | -5.580                                               | 0.607   |

**Data S1: Measures of the ligand response and basal data grouped by dataset as described in table S6 and raw values.** A description of the different spreadsheets can be found in the document.

**Data S2: Signaling-targeted drugs used for drug sensitivity predictions and their corresponding reported GI50 in the cell lines.**

**Data S3: Results of the predictions and coefficients for the significant models for the different datasets used.** The description of the datasets used can be found in table S6.

**Data S4: Results of the predictions and coefficients for significant models using the ligand responses measured by ELISA.**

**Data S5: Results of the stratified models using the basal profile data and model coefficients.**
